# Supplementary material
Source: Elsevier journal article supplement (https://www.sciencedirect.com/science/article/pii/S0300289616300333)
Supplement: mmc1 [file S0300289616300333:mmc1.pdf]

## **TÍTULO**

**Guía de Práctica Clínica del Grupo de Estudio de Infecciones por Micobacterias (GEIM) de la Sociedad Española de Enfermedades Infecciosas y Microbiología Clínica (SEIMC) y la Sociedad Española de Neumología y Cirugía Torácica (SEPAR) sobre el uso de las pruebas de liberación de interferón- $\gamma$  (IGRA) para el diagnóstico de Infección Tuberculosa**

## **COORDINADORES**

### **Miguel Santin**

Servicio de Enfermedades Infecciosas, Hospital Universitario de Bellvitge-IDIBELL; Feixa Llarga, s/n, 08907 L'Hospitalet de Llobregat, Barcelona; Departamento de Ciencias Clínicas, Universidad de Barcelona; Hospitalet de Llobregat, Barcelona.

Tfno.: 93 260 7625; Correo electrónico: [msantin@bellvitgehospital.cat](mailto:msantin@bellvitgehospital.cat)

### **José María García**

Unidad de Gestión Clínica de Neumología. Hospital San Agustín; C/Camino de Heros, 4, 33400, Avilés, Asturias.

Tfno.: 985 123 000 (Ext.: 24386, 23089); correo electrónico: [josemariagarciag@hotmail.com](mailto:josemariagarciag@hotmail.com)

### **José Domínguez**

Servicio de Microbiología. Instituto de Investigación Trias i Pujol; Carretera del Canyet, s/n, 08916 Badalona, Barcelona; Departamento de Genética y Microbiología, Universidad Autónoma de Barcelona; CIBER Enfermedades Respiratorias; Badalona, Barcelona.

Tfno.: 934 978 977; correo electrónico: [jadomb@gmail.com](mailto:jadomb@gmail.com)

## AUTORES

Miguel Santin<sup>1, 2</sup>, José-Maria García-García<sup>3</sup>, David Rigau<sup>4</sup>, Neus Altet<sup>5, 6</sup>, Luis Anibarro<sup>7</sup>, Irma Casas<sup>8, 9</sup>, Nuria Díez<sup>10</sup>, Mercedes García-Gasalla<sup>11</sup>, Xavier Martínez-Lacasa<sup>12</sup>, Antón Penas<sup>13</sup>, Elvira Pérez-Escolano<sup>14</sup>, Francisca Sánchez<sup>15</sup>, Jose Domínguez<sup>16, 17, 18</sup>

<sup>1</sup>Servicio de Enfermedades Infecciosas, Hospital Universitario de Bellvitge-IDIBELL, L'Hospitalet de Llobregat, Barcelona; <sup>2</sup>Departamento de Ciencias Clínicas, Universidad de Barcelona, Barcelona; <sup>3</sup>Unidad de Gestión Clínica de Neumología, Hospital San Agustín, Avilés, Asturias; <sup>4</sup>Centro Cochrane Iberoamericano, Instituto de Investigación Biomédica (IIB-Sant Pau), Barcelona; <sup>5</sup>Unidad de Tuberculosis Valle de Hebron; <sup>6</sup>Instituto de Investigación en Atención Primaria Jordi Gol; <sup>7</sup>Unidad de Tuberculosis, Enfermedades Infecciosas, Servicio de Medicina Interna, Complejo Hospitalario de Pontevedra, Pontevedra; <sup>8</sup>Servicio de Medicina Preventiva, Hospital Germans Trias i Pujol, Badalona, Barcelona; <sup>9</sup>Departamento de Pediatría, Obstetricia-Ginecología y Medicina Preventiva, Universidad Autónoma de Barcelona, Barcelona; <sup>10</sup>Servicio de Pediatría, Hospital Universitario Río Hortega, Valladolid; <sup>11</sup>Servicio de Medicina Interna, Hospital Son Llàtzer, Palma de Mallorca; <sup>12</sup>Unidad Control de Tuberculosis, Hospital Universitario Mutua de Terrassa, Terrassa, Barcelona; <sup>13</sup>Unidad de Tuberculosis, Servicio de Neumología, Hospital Universitario Lucus Augusti, Lugo; <sup>14</sup>Servicio de Medicina Interna, Enfermedades Infecciosas, Hospital de Jerez, Jerez; <sup>15</sup>Servicio de Enfermedades Infecciosas, Hospital del Mar, Instituto Mar de Investigaciones Médicas (IMIM), Barcelona; <sup>16</sup>Servicio de Microbiología, Instituto de Investigación Trias i Pujol, Badalona, Barcelona; <sup>17</sup>Departamento de Genética y Microbiología, Universidad Autónoma de Barcelona; <sup>18</sup>CIBER Enfermedades Respiratorias.

## Correspondencia:

Servicio de Microbiología. Instituto de Investigación Trias i Pujol; Carretera del Canyet, s/n, 08916 Badalona, Barcelona; Departamento de Genética y Microbiología, Universidad Autónoma de Barcelona; CIBER Enfermedades Respiratorias; Badalona, Barcelona.

Tfno.: 934 978 977; correo electrónico: jadomb@gmail.com

**Word count (summary): 243**

**Word count (manuscript): 5322**

**References: 89**

**Tables: 11**

## **Agradecimientos**

Revisores externos de la Guía: Fernando Alcaide (Servicio de Microbiología, Hospital Universitario de Bellvitge, L'Hospitalet de Llobregat, Barcelona), Ángel Domínguez (Servicio de Enfermedades Infecciosas, Hospital Virgen Macarena, Sevilla), Jordi Dorca (Servicio de Neumología, Hospital Universitario de Bellvitge, Barcelona), Lourdes Mateo (Servicio de Reumatología, Hospital Germans Trias i Pujol, Badalona, Barcelona), María J. Mellado Peña (Servicio de Pediatría Hospitalaria y E. Infecciosas y Tropicales Pediátricas, Hospital Universitario Infantil La Paz, Madrid), Juan J. Palacios (Laboratorio Regional de Micobacterias, Hospital Universitario Central de Asturias, Oviedo, Asturias), Antonio Rivero (Servicio de Enfermedades Infecciosas, Hospital Reina Sofía, Córdoba), Anna Rodés (Prevençió i Control de la Tuberculosi, Subdirecció General de Vigilància i Resposta a Emergències de Salut Pública.Agència de Salut Pública de Catalunya), Juan Ruíz Manzano (Servicio de Neumología, Hospital Germans Trias i Pujol, Badalona, Barcelona).

El grupo de trabajo agradece a SEPAR que haya facilitado el espacio e infraestructura en su sede social para las dos reuniones presenciales.

## **Financiación e independencia editorial**

Este documento se ha realizado sin financiación por parte de ninguna empresa o compañía con ánimo de lucro. La SEIMC y la SEPAR financiaron los desplazamientos de los respectivos miembros del grupo a las reuniones realizadas. La SEPAR cedió espacios para la celebración de dos reuniones (constitución del grupo y elaboración de las recomendaciones). Ninguna de las sociedades científicas representadas ha influido en el proceso de evaluación de la calidad de la evidencia ni en el de elaboración de las recomendaciones.

## Resumen

**Introducción.** Las técnicas de detección in vitro de interferón-gamma (IGRA del inglés interferon-gamma release assays), están ampliamente implantadas para el diagnóstico de infección tuberculosa en países de baja prevalencia. Sin embargo, no hay consenso sobre su aplicación. El objetivo fue desarrollar una guía de práctica clínica para el uso de los IGRA en los diferentes escenarios clínicos en España.

**Métodos.** Un grupo de expertos compuesto por especialistas en enfermedades infecciosas, enfermedades respiratorias, microbiología, pediatría y medicina preventiva, junto con un metodólogo formularon las preguntas clínicas y los desenlaces de interés, llevaron a cabo una búsqueda sistemática de la literatura, sintetizaron la evidencia y gradaron su calidad, y formularon las recomendaciones siguiendo la metodología GRADE (*Grading of Recommendations of Assessment Development and Evaluations*).

**Resultados.** El grupo de trabajo formuló las recomendaciones sobre el uso de los IGRA para el diagnóstico de infección tuberculosa en el estudio de contactos (adultos y niños), trabajadores sanitarios, pacientes inmunosuprimidos (pacientes infectados por el virus de la inmunodeficiencia humana, pacientes afectados de enfermedades inflamatorias inmuno-mediadas candidatos a terapias biológicas y pacientes que requieren trasplante de órganos), y en el diagnóstico de enfermedad tuberculosa activa. La mayor parte de las recomendaciones fueron débiles, principalmente debido a la falta de evidencia de calidad para establecer un balance entre beneficios y daños de los IGRA en comparación con la prueba de la tuberculina.

**Conclusión.** Este documento proporciona una guía basada en la evidencia para el uso de los IGRA para el diagnóstico de infección tuberculosa en pacientes en riesgo de tuberculosis o con sospecha de enfermedad activa. Esta guía es aplicable en la atención especializada y primaria, y salud pública.

## Abstract

**Introduction.** Interferon-gamma release assays are widely used for the diagnosis of tuberculosis infection in low-prevalence countries. However, there is no consensus on their application. The objective was to develop a guideline for the use of interferon-gamma release assays in specific clinical scenarios in Spain.

**Methods.** A panel of experts comprising specialists in infectious diseases, respiratory diseases, microbiology, pediatrics and preventive medicine, together with a methodologist formulated the clinical questions and outcomes of interest, conducted a systematic literature search, synthesized the evidence and rated its quality, and formulated the recommendations following the GRADE (*Grading of Recommendations of Assessment Development and Evaluations*) methodology.

**Results.** The panel formulated recommendations on the use of interferon-gamma release assays for the diagnosis of tuberculosis infection in the contact-tracing study (adults and children), health care workers, immunosuppressed patients (patients infected with human immunodeficiency virus, patients with chronic immunomediated inflammatory diseases due to start biologic therapy and patients requiring organ transplant) and in the diagnosis of active tuberculosis. Most recommendations were weak mainly due to the lack of good quality evidence to balance the clinical benefits and downsides of the interferon-gamma release assays as compared with the tuberculin skin test.

**Conclusion.** This document provided evidence-based guidance on the use of interferon-gamma release assays for the diagnosis of tuberculosis infection in patients at risk of tuberculosis or suspected of having active disease. The guideline will be applicable to specialist and primary care, and in public health settings.

## Introducción

El diagnóstico de la infección tuberculosa se ha realizado tradicionalmente mediante la prueba de la tuberculina (PT), aunque desde hace ya una década se dispone de las técnicas de diagnóstico *in vitro* conocidas como IGRA (*Interferon Gamma Release Assays*) cuyo uso, como complemento o sustitución de la PT, está en discusión.

El diagnóstico de infección tuberculosa tiene como objetivo la identificación y el tratamiento de las personas en riesgo para evitar el desarrollo de enfermedad activa. Los contactos cercanos de pacientes con TB, personas infectadas por el virus de la inmunodeficiencia humana (VIH), pacientes con terapias inmunosupresoras, y los trabajadores sanitarios tienen mayor riesgo de sufrir TB. En consecuencia, se debe realizar el cribado y tratamiento de infección tuberculosa en esas poblaciones de riesgo (1). La PT consiste en la administración intradérmica de PPD-S (*purified protein derivate* de Seibert), o en España su equivalente, la tuberculina PPD-RT23. Su principal inconveniente radica en que la mayoría de las proteínas presentes en el PPD no son específicas de *Mycobacterium tuberculosis*, encontrándose también en micobacterias no- tuberculosas. Ello reduce su especificidad, ya que los individuos sensibilizados por una exposición previa a otras micobacterias o que han sido inmunizados con el bacilo de Calmette-Guérin (vacuna BCG) pueden responder inmunológicamente al PPD. Por otra parte, una PT negativa puede deberse a un defecto en la propia técnica o a la existencia de situaciones clínicas que provocan inmunodepresión, incluyendo la TB grave y niños (2). Además, es necesario recordar que una PT obtenida precozmente tras la infección por *M. tuberculosis* puede resultar negativa, ya que han de transcurrir hasta 8 semanas para que se produzca la conversión. Por ello, durante este periodo, denominado período ventana, la PT puede ser negativa aun habiendo infección.

En la última década se han comercializado los IGRA con el objetivo de superar las limitaciones de la PT. Estas técnicas se basan en la detección de interferón (IFN)- $\gamma$  liberado por los linfocitos T de sangre periférica sensibilizados como respuesta a la estimulación *in vitro* con antígenos específicos de *M. tuberculosis*, los cuales están ausentes en la cepa atenuada de *M. bovis* de la vacuna BCG y en la mayoría de las micobacterias ambientales (3). Al respecto se utilizan los antígenos ESAT-6 (RD1 *early secretory antigen target-6*), CFP-10 (RD1 *culture filtrate protein-10*) y TB7.7

(RD11/RV2654) (4). Actualmente existen dos técnicas comercializadas: QuantiFERON®-TB Gold In-tube (QFT-GIT) (Qiagen, Hilden, Germany) y T-SPOT®.TB (Oxford Immunotec, Oxford, UK). El QFT-GIT incluye, además del ESAT-6 y CFP-10, codificados en la región de diferencia RD1, el TB7.7, antígeno codificado en la región de diferencia RD11 (5). El T-SPOT.TB detecta el número de células T productoras de IFN- $\gamma$  tras la estimulación de un número definido de células mononucleares periféricas con ESAT-6 y CFP-10 por separado, mediante ELISPOT (*Enzyme-linked immunospot assay*). Ambas técnicas incluyen un control positivo que detecta la capacidad de las células T para producir IFN- $\gamma$  tras estimulación con un mitógeno. Al igual que la PT, los IGRA tienen un periodo de conversión tras la infección por *M. tuberculosis*, cuya duración no está bien establecida.

### **Alcance y objetivos**

Actualmente no hay uniformidad en los criterios del uso de los IGRA en diferentes escenarios y ámbitos. A pesar de la profusión de datos en la literatura médica, existe escasez de evidencia de calidad que evalúe desenlaces con impacto en la salud de la población a la que se ha de aplicar. Todo ello se refleja en la gran disparidad en las recomendaciones elaboradas por diferentes órganos y sociedades científicas, las cuales se basan fundamentalmente en la opinión de expertos (6,7). Por otra parte, las recomendaciones que pueden ser adecuadas para un determinado país o área no siempre son aplicables a otras. En España se publicaron dos documentos de consenso en 2008 y 2010 sobre el diagnóstico y tratamiento de la TB en adultos (8) y niños (9) respectivamente, los cuales incluían recomendaciones específicas sobre el uso de los IGRA.

Este documento pretende ser una guía, basada en la evidencia, para especialistas, médicos de asistencia primaria y responsables de salud pública para el uso de los IGRA en el diagnóstico de personas inmunocompetentes e inmunodeprimidas, adultos y niños, en riesgo de sufrir TB o con sospecha de padecerla. El objetivo final del documento es minimizar la incertidumbre y variabilidad en el diagnóstico de la infección TB mediante los IGRA. Está fuera del alcance de esta guía formular recomendaciones sobre cuándo se ha de realizar cribado de infección TB ni sobre cuándo y cómo tratarla. Los autores refieren a los lectores a guías específicas para ello

(10). Sin embargo, los autores hacen hincapié en que se ha de focalizar el cribado en aquellas personas susceptibles de desarrollar TB activa en caso de estar infectadas, y que por tanto, serán tributarias de tratamiento preventivo (*"Intention to test, intention to treat"*).

## **Metodología**

### **Grupo de trabajo**

El grupo elaborador de la guía está formado por profesionales de atención especializada (Enfermedades Infecciosas, Neumología, Microbiología, Pediatría y Medicina Preventiva) y un experto en Metodología. Los miembros del grupo de trabajo se dividieron en subgrupos de trabajo (estudio de contactos, trabajadores sanitarios, niños, personas infectadas por el VIH, pacientes con enfermedades inflamatorias crónicas, pacientes candidatos a trasplante y pacientes con sospecha de TB activa) según su perfil clínico, y cada subgrupo fue coordinado por uno de los tres coordinadores. El experto en metodología instruyó a los miembros del grupo de trabajo en la metodología, realizó la búsqueda bibliográfica, guió las deliberaciones y sintetizó las recomendaciones formuladas. Excepto el experto en metodología, el resto de autores de la GPC participó en las deliberaciones de las reuniones de grupo sobre las recomendaciones. Uno de los coordinadores (M.S.) elaboró el borrador inicial del manuscrito, y finalmente, todos los miembros del grupo de trabajo revisaron y aprobaron la versión final del mismo. No se invitaron a asistir a las reuniones del grupo de trabajo personas que hubiesen tenido TB o diagnosticados de infección TB, ni tampoco público en general. Su participación hubiese requerido una formación intensiva sobre las implicaciones de los resultados de las pruebas y los desenlaces de salud. En su lugar, los miembros del grupo de trabajo hicieron inferencias sobre cómo los pacientes valorarían los desenlaces críticos e importantes considerados en la guía.



## Preguntas clínicas

Las preguntas fueron estructuradas siguiendo el formato PICO (Población, Intervención [prueba índice], Comparación [prueba de referencia] y Desenlaces [*Outcomes*]), y se priorizaron los desenlaces claves de interés. Ante la ausencia de ensayos clínicos que evalúen la eficacia del tratamiento preventivo de TB en personas en riesgo de tuberculosis basado en el resultado de los IGRAs, el grupo reconoce que los resultados de los índices de rendimiento diagnóstico de las pruebas, derivados de estudios observacionales, constituye evidencia indirecta de los beneficios y consecuencias últimas del manejo de los pacientes en base a estos resultados. Este aspecto limitó la calidad de la evidencia (confianza con los resultados) en todas las preguntas evaluadas. Dicha limitación es también aplicable para el diagnóstico de TB activa.

## Desenlaces de interés

Dado que el rendimiento diagnóstico de los IGRAs para la ITBL no puede ser medido directamente por la falta de un estándar de referencia adecuado, se han utilizado los siguientes desenlaces, con la siguiente clasificación jerárquica en función de su relevancia (de mayor a menor) (11): 1º eficacia del tratamiento preventivo basado en el resultado de los IGRAs, 2º valor predictivo de los IGRAs para el desarrollo de TB activa, 3º correlación con el gradiente de exposición y con los factores de riesgo para infección tuberculosa, 4º sensibilidad y especificidad en TB activa y 5º concordancia con la PT. A efectos de las recomendaciones a realizar en la guía, se ha tenido en cuenta, en caso de existir, la evidencia derivada únicamente de las dos primeras, ya que son las que tendrán impacto en la población en la que se le va a aplicar.

## Búsqueda bibliográfica

Se diseñó la búsqueda para identificar revisiones sistemáticas (RS) de estudios diagnósticos y estudios individuales para actualizar las RS relevantes. Los autores priorizaron los ensayos clínicos –si hubiere- y estudios observacionales prospectivos de países de baja prevalencia (<25 casos x 100,000), que usaron las pruebas comerciales QTF-GIT y T-SPOT.TB en sangre con 16-24 h de incubación. En el caso de no haber datos de países de esas características, se usaron estudios de países de media y alta

prevalencia. Se excluyeron estudios realizados con IGRA no comercializados o basados en la versión de QTF-Gold, así como estudios que no presentaban datos originales, resúmenes de congresos, editoriales, revisiones, guías y estudios en animales. Se consultaron las siguientes bases de datos electrónicas sin límites lingüísticos ni temporales, hasta marzo de 2013: MEDLINE (accedido mediante PubMed) y EMBASE (accedido mediante Ovid). Las búsquedas bibliográficas fueron actualizadas en octubre de 2014. El grupo de autores se mantuvo actualizado de manera continua hasta junio de 2015, para identificar estudios más relevantes o de impacto durante todo el proceso de elaboración de la GPC. La búsqueda se llevó a cabo mediante la combinación de varios términos, los cuales se muestran en el anexo 1. Para la evaluación de la literatura de costes y uso de recursos se realizó una búsqueda de la literatura en la base de datos de NHS EED (octubre 2014). No se realizó una búsqueda específica para identificar estudios sobre valores y preferencias de los pacientes dado que no se consideraron desenlaces clínicos. Sin embargo el grupo elaborador reflejó su juicio sobre la importancia relativa de los diferentes desenlaces de rendimiento diagnóstico.

### **Extracción de los datos y síntesis de la evidencia**

Dos miembros de cada subgrupo de trabajo recopilaron los datos de manera independiente por medio de un formulario de recogida de datos previamente establecido. Las discrepancias se resolvieron mediante discusión y consenso entre los dos miembros y el coordinador. Se extrajeron los siguientes datos: año de publicación, periodo y país, número de participantes, género, prueba evaluada, resultados de la PT, desarrollo de TB, y fracción de individuos con resultados verdaderos positivos, falsos negativos, verdaderos negativos y falsos positivos para el cálculo de la sensibilidad y

especificidad en caso de ser necesarios. Se usaron las siguientes definiciones: Sensibilidad, proporción de pacientes con TB que tuvieron un resultado positivo de la prueba; especificidad, proporción de pacientes sin TB que tuvieron un resultado negativo de la prueba; valor predictivo positivo (VPP), proporción de pacientes con un resultado positivo de la prueba que tuvieron TB, y valor predictivo negativo (VPN), proporción de pacientes con resultado negativo de la prueba que no tuvieron TB.

### **Calidad de la evidencia**

La evaluación de la calidad de la evidencia se realizó siguiendo las directrices del grupo internacional de trabajo GRADE (*Grading of Recommendations of Assessment Development and Evaluations*) (12). Para cada desenlace incluido en la pregunta clínica, se evaluó la calidad de la evidencia disponible. Se consideraron los siguientes factores: las limitaciones metodológicas, la consistencia en los resultados de los diferentes estudios, la disponibilidad de evidencia directa, la precisión de los estimadores del efecto y el sesgo de publicación. Todo el proceso de evaluación permitió clasificar la calidad de la evidencia para cada desenlace en cuatro categorías: alta, moderada, baja o muy baja.

### **Recomendaciones**

A partir del resumen de la evidencia disponible para cada pregunta clínica, se formularon las recomendaciones siguiendo la metodología GRADE. Para determinar la dirección (a favor o en contra de una intervención) y la fuerza de las recomendaciones (fuertes o débiles), se ponderaron los resultados de la calidad global de la evidencia disponible, el balance entre los beneficios y los riesgos, la importancia relativa de los desenlaces y el uso de recursos y costes asociados. Las recomendaciones se establecieron por consenso entre los miembros del grupo de trabajo.

El material utilizado, como los formularios de extracción de datos, el resumen de los hallazgos y la evidencia para la formulación de las recomendaciones están disponibles mediante solicitud a los autores.

### **Recomendaciones**

La tabla 1 resume las recomendaciones finales.

### Uso de los IGRA en el estudio de contactos de pacientes con TB

**Recomendación:** *El grupo de trabajo sugiere iniciar el estudio de contactos en adultos con la PT, y en los vacunados con BCG confirmar los resultados positivos con un IGRA en el momento de la lectura de la PT. (Recomendación débil; baja a muy baja calidad de evidencia.)*

**1. Resumen de la evidencia.** Cinco estudios observacionales evaluaron el valor predictivo de los IGRA para el desarrollo de TB en contactos en países de baja prevalencia: cuatro con QTF-GIT (13-16) y uno con QTF-GIT y T-SPOT.TB (17). Cuatro estudios fueron prospectivos (13)(15-17) y uno retrospectivo (14). Tres de ellos evaluaron a su vez el valor predictivo de la PT para el desarrollo de TB (14)(15)(17). El periodo de observación fue variable, pero de al menos 12 meses en todos los estudios. El valor predictivo positivo (VPP) para QTF-GIT (622 sujetos) osciló entre 0,4% y 17,3%; para T-SPOT.TB (181 sujetos), 3,3%, y para la PT  $\geq 10$  mm (795 sujetos), entre 2,8% y 3,1%. Los correspondientes valores predictivos negativos (VPN) oscilaron entre 98% y 100% para QTF-GIT (2426 sujetos); fue 98,3% para T-SPOT.TB (118 sujetos), y entre 99,4% y 100% para la PT  $\geq 10$  mm (828 sujetos) (**Tabla 2**).

**2. Calidad de la evidencia.** La calidad global de la evidencia fue baja a muy baja. Los principales factores que limitaron la confianza en los resultados fueron la ausencia de evidencia directa de los desenlaces considerados y el riesgo de sesgo asociado al diseño de los estudios.

**3. Justificación.** El porcentaje de pacientes que no desarrollaron TB tras un resultado negativo fue muy elevado (entre el 98% y el 100%) con cualquiera de las pruebas. Debido a la mayor accesibilidad de la PT, se justifica su uso como prueba inicial de cribado. En los contactos vacunados con BCG, la validación mediante un IGRA seleccionaría mejor los casos tributarios de terapia preventiva (el porcentaje de positividad con los IGRA es inferior al de la PT), lo cual reduciría el número de tratamientos indicados mediante los IGRA en comparación con la PT. Dicha disminución no parece conllevar un mayor riesgo de TB ulterior (18).

En la población vacunada con BCG, la utilización de los IGRA supone más beneficios que inconvenientes, mientras que en la población no vacunada, el balance podría estar más equilibrado. Por tanto, el impacto de la implementación de esta estrategia a nivel programático dependerá de la prevalencia de vacunación con BCG en la población.

Si bien el coste directo es favorable a la PT, el coste global de la utilización de los IGRA, incluyendo los costes indirectos derivados de la menor prescripción de tratamiento, sería inferior a la utilización exclusiva de la PT, como parecen indicar los estudios de coste-efectividad (19).

### **Uso de los IGRAs para el cribado de los trabajadores sanitarios**

**Recomendación:** *El grupo de trabajo sugiere realizar el cribado inicial y periódico con la PT, y confirmar los casos positivos mediante un IGRA en el momento de la lectura (Recomendación débil; moderada y muy baja calidad de la evidencia para los IGRA y la PT respectivamente).*

*Una vez la PT resulta positiva (con IGRA negativo), si no hay indicios de enfermedad activa ni evidencia de inmunosupresión, se seguirá el cribado periódico con el IGRA. (Recomendación débil; calidad de evidencia baja).*

**1. Resumen de la evidencia.** Tres estudios observacionales evaluaron el valor predictivo de los IGRA para el desarrollo de TB en trabajadores sanitarios en un periodo de uno a tres años, en países de baja prevalencia: dos con QTF-GIT (13)(20) y uno con QTF-GIT y T-SPOT.TB (21). Un estudio evaluó a su vez el valor predictivo de la PT (21). Los tres estudios fueron prospectivos. Los VPP para el desarrollo de TB oscilaron entre 0% y 0,4% para QTF-GIT (891 sujetos); 0% para T-SPOT.TB (144 sujetos de 1 único estudio), y del 0% para la PT  $\geq 10$  mm (5 mm en inmunodeprimidos) (125 sujetos de 1 único estudio). Los correspondientes VPN fueron del 100% para QTF-GIT (4171 sujetos), T-SPOT.TB (2274 sujetos) y PT (2293 sujetos) respectivamente (**Tabla 3a**). Diez estudios evaluaron las tasas de conversiones y reversiones de los IGRA (20-29): ocho con QTF-GIT (20, 22-28) y dos con QTF-GIT y T-SPOT.TB (21)(29). Un estudio la conversión y reversión de la PT (21). Los diez estudios fueron observacionales, ocho prospectivos (20-25)(29), y dos retrospectivos (27-28). Las conversiones oscilaron entre el 0,7% y el 8,3% para QTF-GIT, entre el 3,9% y el 6,1% para T-SPOT.TB, y fueron

del 0,9% para la PT. En el único estudio que se evaluaron los IGRA y la PT en la misma población (21), hubo 8,3%, 6,1% y 0,9% de conversiones para QTF-GIT, T-SPOT.TB y la PT  $\geq 10$  mm (5 mm en inmunodeprimidos) respectivamente. Las reversiones oscilaron entre el 31% y el 71% para QTF-GIT y fueron del 52,9% en un estudio con T-SPOT.TB. No hubo estudios que evaluaran las reversiones de la PT (**Tabla 3b**).

**2. Calidad de la evidencia.** La calidad global de la evidencia fue moderada para la evaluación de los valores predictivos de los IGRA, y muy baja para los valores predictivos de la PT. Los principales factores que limitaron la confianza en los resultados fueron la ausencia de evidencia directa de los desenlaces considerados y la imprecisión debida al reducido número de casos evaluados.

**3. Justificación.** Tanto la PT como los IGRA ofrecen una gran seguridad en cuanto al bajo riesgo de desarrollo de TB activa en los casos con resultado negativo (VPN 100% en los estudios que lo evaluaron). Dada su fácil accesibilidad, junto con la alta tasa de conversiones y reversiones de los IGRA en el cribado periódico, se justifica el uso de la PT como prueba inicial de cribado. Sin embargo, la confirmación de los resultados positivos mediante un IGRA, redundaría en una mejor capacidad de seleccionar a los sujetos tributarios de tratamiento preventivo, y por consiguiente, la reducción del número de individuos tratados (18)(30).

Si bien el coste directo es favorable a la PT, el coste global de la utilización de los IGRA, incluyendo los costes indirectos derivados de la menor prescripción de tratamiento, sería inferior a la utilización exclusiva de la PT, como parecen indicar los estudios de coste-efectividad (19). Sin embargo, la utilización de un IGRA para el cribado periódico del personal sanitario tendría un coste no despreciable.

#### **Uso de los IGRA para el diagnóstico de TB activa en niños menores de 5 años.**

**Recomendación:** *En niños menores de 5 años con sospecha fundada de TB, el grupo de trabajo sugiere realizar la PT e IGRA como pruebas complementarias al estudio microbiológico y radiológico para el diagnóstico (Recomendación débil; muy baja calidad de evidencia).*

**1. Resumen de la evidencia.** Solamente un estudio evaluó el rendimiento de los IGRA y la PT para el diagnóstico de TB activa en niños menores de 5 años en países de baja

prevalencia (31). Se trata de un estudio prospectivo en el que se evaluaron ambos IGRA y la PT sobre la misma población. La sensibilidad y especificidad para el diagnóstico de TB activa fueron respectivamente 93% (IC95% 77%-99%) y 100% (IC95% 91%-100%) para QTF-GIT (68 sujetos); 93% (IC95% 77%-99%) y 98% (IC95% 87%-100%) para T-SPOT.TB, y 100% (IC95% 88%-100%) y 58% (IC95% 42%-73%) para la PT (73 sujetos) (**Tabla 8a**).

**2. Calidad de la evidencia.** La calidad global de la evidencia fue muy baja. Los principales factores que limitaron la confianza en los resultados fueron: la ausencia de evidencia directa de los desenlaces considerados y la imprecisión de los resultados por el reducido número de casos evaluados.

**3. Justificación.** La detección de infección TB (con PT o IGRA) como prueba adicional para el diagnóstico de enfermedad activa es esencial para iniciar tratamiento temprano en la población infantil, en la cual el rendimiento diagnóstico de la baciloscopia y el cultivo son limitados. El grupo da mucho valor a la capacidad de las pruebas para detectar todos los casos de TB activa en niños con sospecha fundada, relativizando el potencial incremento de tratamientos innecesarios. Al tratarse de una población vulnerable en la que el fallo en la detección de la enfermedad puede tener consecuencias muy graves, el grupo ha considerado que las ventajas de la combinación de ambas pruebas compensan los inconvenientes y el incremento del coste asociado. De hecho, algunos de los miembros del grupo de trabajo abogaban por el uso de los dos IGRA en caso de disponer de ellos.

#### **Uso de los IGRA para el estudio de contactos en niños.**

**Recomendación:** *En niños mayores de 5 años, el grupo de trabajo sugiere iniciar el estudio de contactos con PT, y en los vacunados con BCG, confirmar los casos positivos mediante un IGRA en el momento de la lectura de la PT (Recomendación débil; muy baja calidad de evidencia).*

*En niños menores de 5 años, el grupo de trabajo sugiere realizar el estudio de contactos con la PT e IGRA independientemente de si estuviesen vacunados previamente con BCG (Recomendación débil; baja calidad de evidencia).*

**1. Resumen de la evidencia.** Dos estudios observacionales evaluaron el valor predictivo de QTF-GIT y la PT para el desarrollo de TB en niños contactos de alto riesgo (contacto conviviente de caso índice) en países de baja prevalencia (14)(32). Los VPP para el desarrollo de TB fueron 5.3% y 75% para QTF-GIT (32 sujetos) y 4% y 14% para la PT (82 sujetos). Los correspondientes VPN fueron del 100% para QTF-GIT (135 sujetos) y la PT (84 sujetos) respectivamente. **(Tabla 4).**

**2. Calidad de la evidencia.** La calidad global de la evidencia fue baja. Los principales factores que limitaron la confianza en los resultados fueron la ausencia de evidencia directa de los desenlaces considerados, además en el único estudio disponible se desconoce el número de niños menores de 5 años por lo que la evidencia es aún más indirecta. Los resultados fueron imprecisos debido al reducido número de sujetos.

**3. Justificación.** La diferenciación de estrategia entre niños hasta y mayores de 5 años se fundamenta en el peor rendimiento diagnóstico de los IGRA en los menores de 5 años y el mayor riesgo de progresión y gravedad de la enfermedad en esta franja de edad. En el estudio evaluado, ninguno de los casos negativos a PT o IGRA desarrolló TB. En los niños mayores de 5 años, la fácil accesibilidad de la PT justifica su uso como prueba inicial de cribado. La realización secuencial de un IGRA en los casos positivos seleccionaría mejor los casos tributarios de tratamiento preventivo. En niños hasta 5 años, el grupo justifica la sugerencia de realizar ambas, la PT y un IGRA, por la importancia de maximizar la detección de los casos infectados, que presentan un alto riesgo de progresión a TB activa, considerando que las ventajas compensarían los inconvenientes y el coste de una prueba adicional.

#### **Uso de los IGRA para el cribado de infección TB en las personas infectadas por el VIH.**

**Recomendación:** *Para el cribado de infección tuberculosa en las personas infectadas por el VIH, el grupo de trabajo sugiere realizar la PT y un IGRA (Recomendación débil; baja calidad de evidencia).*

*En personas con un nivel de CD4 <200/mL, el grupo de trabajo sugiere realizar solo un IGRA (Recomendación débil; muy baja calidad de evidencia).*

**1. Resumen de la evidencia.** Cinco estudios observacionales evaluaron los valores predictivos para el desarrollo de TB en personas infectadas por el VIH en países con



baja prevalencia: dos con QTF-GIT solo (33)(34), dos con QTF-GIT y T-SPOT (35)(36), y uno con T-SPOT solo (37). Cuatro estudios fueron prospectivos (33)(34)(36)(37) y uno retrospectivo (35). Uno de ellos evaluó también el valor predictivo de la PT (36). Los VPP para el desarrollo de TB oscilaron entre el 5,9% y el 25% para QTF-GIT (888 sujetos), entre el 6,3% y el 9,1% para T-SPOT.TB (133 sujetos), y fue del 7,1% para la PT (sobre 42 sujetos). Los correspondientes VPN fueron del 98,8% para QTF-GIT (1524 sujetos), del 100% T-SPOT.TB (684 sujetos) y del 98,9% para la PT (584 sujetos) (**Tabla 5**).

La revisión identificó tres RS que incluían estudios que evaluaban el uso de los IGRA en países de baja prevalencia (38-40). De ellas se seleccionó la más reciente y amplia para extraer datos de sensibilidad y especificidad para TB activa, y el efecto de la inmunosupresión sobre el rendimiento de los IGRA en pacientes infectados por el VIH (39). La sensibilidad y especificidad en países de baja incidencia de infección TB fueron 61% y 72% para QTF-GIT, y 65% y 70% para T-SPOT.TB respectivamente. En ambos IGRAs, hubo un incremento de resultados indeterminados con cifras de CD4 <200 células/mm<sup>3</sup>: 8,1% para QTF-GIT y 4% para T-SPOT.TB.

**2. Calidad de la evidencia.** La calidad global de la evidencia fue baja a muy baja. Los principales factores que limitaron la confianza en los resultados fueron la ausencia de evidencia directa de los desenlaces considerados, la imprecisión por el reducido número de sujetos, y el riesgo de sesgo derivado del diseño de los estudios.

**3. Justificación.** El grupo de trabajo priorizó detectar todos los casos infectados dado el alto riesgo de progresión a TB activa en los pacientes infectados por el VIH, y una menor importancia a los casos incorrectamente clasificados como positivos que recibirían tratamiento innecesario. La combinación de la PT e IGRA aumenta la capacidad de detección de los casos, por lo que las ventajas probablemente superan a los inconvenientes. Para justificar el uso de IGRA solo en pacientes con menos de 200 CD4, el grupo de trabajo considera que la PT excepcionalmente podría añadir casos no detectados por los IGRA. De ahí que a pesar de la pobre evidencia al respecto, se sugiere cribar exclusivamente con IGRA.

La implementación de los IGRA no debería suponer un problema ya que los pacientes infectados por el VIH son tratados en unidades especializadas de centros cuyos laboratorios están capacitados para su realización.

### **Uso de los IGRA para el cribado de infección TB en los pacientes con enfermedades inflamatorias crónicas (EIC), previo a recibir terapia biológica.**

**Recomendación:** *Para el cribado de infección TB en los pacientes con EIC que vayan a recibir terapias biológicas, el grupo de trabajo sugiere realizar la PT y un IGRA (Recomendación débil; baja a muy baja calidad de evidencia).*

**1. Resumen de la evidencia.** Ocho estudios observacionales evaluaron el valor predictivo de los IGRA para el desarrollo de TB en pacientes que reciben terapias biológicas en países de baja prevalencia: cuatro con QTF-GIT (41-44), dos con QTF-GIT y T-SPOT.TB (36, 45), y dos con T-SPOT.TB (46, 47). Solo dos ellos (36, 47) evaluaron el VPP en un pequeño número de pacientes. Siete estudios fueron prospectivos (36, 41-45, 47) y uno retrospectivo (46). Siete estudios evaluaron a su vez el valor predictivo de la PT para el desarrollo de TB (36, 41, 42, 44-47). Los VPP para el desarrollo de TB fueron 0% para QTF-GIT (20 sujetos), entre 0 y 5,4% para T-SPOT.TB (131 sujetos), y entre 0 y 5,4% para la PT (237 sujetos). Los correspondientes VPN oscilaron entre el 97% y el 100% para QTF-GIT (2535 sujetos), 100% para T-SPOT.TB (563 sujetos) y entre el 98,3% y el 100% para la PT (2468 sujetos) (**Tabla 6**).

En cinco estudios se evaluó el impacto de la inmunosupresión producida por los fármacos utilizados en el tratamiento de la enfermedad de base en el rendimiento de los IGRA y la PT (48-52). Cuatro estudios (747 sujetos), analizaron la prevalencia de resultados indeterminados de QTF-GIT (48,49, 51, 52). En los cuatro se demostró una asociación entre la inmunosupresión y un mayor riesgo de resultados indeterminados. En un estudio se halló asociación con el uso de prednisolona y una fuerte correlación dosis efecto (48).

**2. Calidad de la evidencia.** La calidad global de la evidencia fue baja a muy baja. Los principales factores que limitaron la confianza en los resultados fueron: la ausencia de evidencia directa de los desenlaces considerados, la imprecisión de los resultados por

el reducido número de casos evaluados y el riesgo de sesgo derivado del diseño de algunos estudios.

**3. Justificación.** Atendiendo al alto riesgo de progresión a TB activa, frecuentemente diseminada, en los pacientes que reciben terapias biológicas, el grupo de trabajo priorizó detectar todos los casos infectados y una menor importancia a los casos incorrectamente clasificados como positivos que recibirían tratamiento innecesario. La combinación de la PT e IGRAs aumenta la capacidad de detección de los casos, por lo que las ventajas probablemente superan a los inconvenientes.

La escasa evidencia no permite al grupo formular recomendaciones específicas para cada grupo de pacientes tributarios de terapias biológicas, como enfermedades reumáticas, psoriasis y enfermedad inflamatoria intestinal.

La implementación de los IGRAs no debería suponer un problema ya que los pacientes con enfermedades tributarias de terapias biológicas suelen ser tratados en unidades especializadas de centros cuyos laboratorios están capacitados para su realización.

#### **Uso de los IGRA para el cribado de infección TB en pacientes tributarios de trasplante**

**Recomendación:** *Para el cribado de infección TB en los pacientes que van a ser sometidos a trasplante de órgano sólido o de precursores hematopoyéticos, se sugiere realizar la PT y un IGRA (Recomendación débil; muy baja calidad de evidencia).*

**1. Resumen de la evidencia.** Tres estudios observacionales evaluaron el valor predictivo de los IGRA para el desarrollo de TB en pacientes sometidos a trasplante de órgano sólido (TOS) o de precursores hematopoyéticos (TPH) (allogénico) en países de baja prevalencia (los 3 estudios con QTF-GIT) (35, 53, 54), y tres estudios en un país de prevalencia intermedia-alta (2 con QTF-GIT) (55, 56) y uno con T-SPOT.TB) (57). Un estudio evaluó a su vez el valor predictivo de la PT para el desarrollo de TB (56). Cuatro estudios fueron prospectivos (53, 55-57) y dos retrospectivos (35, 54). Los VPP para el desarrollo de TB en TOS oscilaron entre 0% y 4% para QTF-GIT (47 sujetos) y 6% para T-SPOT.TB (71 sujetos). Los correspondientes VPN oscilaron entre el 99% y 100% para QTF-GIT (954 sujetos), y fue del 100% para (T-SPOT.TB) un estudio con 201 sujetos. Los VPP para el desarrollo de TB en TPH (allogénico) oscilaron entre 0% y el 3% para QTF-GIT (48 sujetos) y 0% para la PT (sobre 39 sujetos de un único estudio). Los

correspondientes VPN oscilaron entre el 95% y el 100% para QTF-GIT (265 sujetos) y 97,5% para la PT (205 sujetos) (**Tabla 7**).

**2. Calidad de la evidencia.** La calidad global de la evidencia fue muy baja. Los principales factores que limitaron la confianza en los resultados fueron la ausencia de evidencia directa de los desenlaces considerados y la utilización de datos provenientes de un entorno de incidencia intermedia-alta de tuberculosis. La confianza con los resultados fue limitada también por el corto seguimiento para el desarrollo del desenlace en algunos estudios, imprecisión y el riesgo de sesgo derivado del diseño de algunos estudios.

**7.4. Justificación.** Atendiendo al alto riesgo de progresión a TB activa en los pacientes con TOS o TPH, el grupo de trabajo priorizó detectar todos los casos infectados, y una menor importancia a los casos incorrectamente clasificados como positivos que recibirían tratamiento innecesario.

La evidencia existente en la literatura únicamente permite hacer una recomendación general del grupo, para todos los pacientes sometidos a TOS o TPH. En esta línea, el riesgo de TB activa en pacientes con TPH (autólogo) es muy inferior al del trasplante alogénico, y no claramente superior al de la población general (58). En consecuencia, la recomendación de cribado y tratamiento de infección tuberculosa del grupo se hace específicamente para TPH alogénico.

La implementación de los IGRA no debería suponer un problema ya que los pacientes trasplantados son tratados en centros específicos con programa de trasplante, cuyos laboratorios están capacitados para su realización.

#### **Uso de los IGRA para el diagnóstico de TB activa**

**Recomendación:** *Para el diagnóstico de TB activa, el grupo de trabajo recomienda no utilizar los IGRA ni la PT como prueba única (Recomendación fuerte; baja calidad de evidencia).*

*En pacientes con sospecha fundada de enfermedad TB, con el objetivo de confirmar la existencia de infección TB, el grupo de trabajo sugiere realizar un IGRA como dato de apoyo al diagnóstico de TB activa (Recomendación débil; baja calidad de la evidencia).*

**1. Resumen de la evidencia.** Se identificaron cinco revisiones sistemáticas que evaluaron la sensibilidad y especificidad de los IGRA para TB activa (59-63). Se seleccionó una que incluyó 20 estudios (62): ocho con QTF-GIT (64-71) (4 aportaban datos en fluidos extrasanguíneos (64-66, 69)) y 12 con T-SPOT.TB (72-83) (7 aportaban datos en fluidos extrasanguíneos (64, 66, 72, 73, 76, 81, 84)). Doce estudios evaluaron a su vez la PT (60, 70-76, 82, 84-86).

La sensibilidad y especificidad de los IGRA en sangre fueron 80% y 79% para QTF-GIT, y 81% y 59% para T-SPOT.TB respectivamente. Los correspondientes resultados en fluidos extrasanguíneos fueron 48% y 82% para QTF-GIT y 88% y 82% para T-SPOT.TB. La sensibilidad y especificidad para PT fueron 65% y 75% respectivamente (**Tablas 8a y b**).

**2. Calidad de la evidencia.** La calidad global de la evidencia fue baja. Los principales factores que limitaron la confianza en los resultados fueron: la ausencia de evidencia directa de los desenlaces considerados, la inclusión de estudios de países de alta incidencia y de un amplio espectro de pacientes (adultos, niños, e inmunocompetentes e inmunodeprimidos).

**3. Justificación.** A pesar de que la calidad de la evidencia existente es baja, es consistente en cuanto al rendimiento sub-óptimo de los IGRA y de la PT como prueba única para el diagnóstico de la enfermedad TB activa. Los inconvenientes de tomar decisiones terapéuticas basadas únicamente en estas pruebas superan los beneficios. Sin embargo, el grupo entiende que en casos con sospecha clínica fundada, la detección de infección tuberculosa es un dato complementario de ayuda en la estrategia diagnóstica de la enfermedad TB. Concretamente, en los pacientes inmunodeprimidos, y en particular los infectados por el VIH, la presencia de infección tuberculosa, se ha identificado como factor asociado a una mayor probabilidad de TB activa en pacientes con sospecha clínica fundada (60).

El grupo de trabajo cree que se puede considerar la realización de T-SPOT.TB en muestras extra-sanguíneas (lavado bronchoalveolar, líquido cefalorraquídeo y líquido pleural) para el diagnóstico.

## **Consideraciones adicionales**

El grupo de trabajo hace las siguientes consideraciones:

1. Los recursos necesarios para la implementación de los IGRA son bajos. Sin embargo, su implementación en áreas no urbanas podría verse dificultada por la necesidad de un laboratorio cercano para facilitar el procesado ágil y rápido de las muestras. Esto es especialmente importante en el caso de T-SPOT.TB, ya que la prueba se ha de realizar en las primeras 24 h., o hasta 48 h. con T-SPOT.TB® *Extend*, tras la incubación (87). Desde el punto de vista de salud pública, la necesidad de flebotomías a grandes colectivos y un laboratorio de referencia podría dificultar la utilización de los IGRA para el estudio de contactos a nivel comunitario.
2. Si bien no se hace distinción entre las dos pruebas IGRAs, algunos miembros del grupo favorecerían el uso de T-SPOT.TB en niños por la percepción de una mayor sensibilidad del mismo sobre QTF-GIT. Sin embargo, se reconoce que la evidencia recogida en diversos meta-análisis no muestra diferencias relevantes entre ambos (39, 88).
3. El grupo da importancia a realizar el cribado de manera precoz, antes de que cualquier enfermedad de base esté muy evolucionada, ya que se compromete la rentabilidad de los IGRA. Esto es particularmente relevante en las personas infectadas por el VIH, pacientes tratados con terapias biológicas y trasplantados. En este sentido, se debe evitar la práctica de QTF-GIT en situaciones de leucopenia, ya que la linfopenia aumenta los resultados indeterminados de la prueba.
4. El grupo no hace una recomendación específica sobre la estrategia simultánea (PT e IGRA) o bien secuencial (iniciar con la PT y en caso de negatividad, realizar el IGRA) en las situaciones en que se considera hacer PT e IGRA. Entiende que la elección de una u otra se ha de guiar por las circunstancias de cada caso y las singularidades de cada centro. En personal sanitario, no ofrecer un IGRA para el cribado de infección tuberculosa podría generar conflicto.
5. En relación al uso de los IGRA en el diagnóstico de la TB activa, el grupo de trabajo enfatiza:

- Necesidad de hacer un uso racional de los IGRA, usándolos siempre y cuando haya una sospecha fundada de la enfermedad.
  - Un resultado positivo de un IGRA en pacientes con síntomas compatibles, particularmente en inmunodeprimidos, obliga a descartar enfermedad activa.
  - Es importante establecer el diagnóstico de TB activa mediante los métodos convencionales y/o moleculares.
6. En personas infectadas por el VIH con inmunosupresión profunda y un IGRA o PT negativa inicial, su repetición una vez recuperada la inmunidad con el tratamiento antirretroviral podría aumentar los casos positivos.
  7. En general, los IGRA son preferibles a la PT en personas con probabilidad de no retornar para la lectura de la misma, como alcohólicos, adictos a drogas y personas sin techo.
  8. El grupo de trabajo considera de vital importancia mejorar la adherencia de los sanitarios a los protocolos de prevención existentes.

### **Aplicabilidad de la Guía**

El grupo de trabajo no espera limitaciones importantes en la aplicabilidad de la Guía en España, ya que los IGRA tienen una amplia implantación, en particular el QTF-GIT, y los costes son asumibles por la sanidad pública. Sin embargo, el grupo de trabajo prevé una mayor dificultad de seguimiento de las recomendaciones en el ámbito de salud pública, en particular en los estudios comunitarios de contactos, situación en la que la necesidad de venopunción, la recolección de las muestras y la necesidad de tener un laboratorio a donde referirlas, son dificultades añadidas.

La mayor parte de las recomendaciones de esta Guía son débiles debido a la ausencia de evidencia de calidad que permitiesen anticipar y hacer un balance entre los beneficios y daños de los IGRA y la PT. Para los clínicos, las recomendaciones débiles indican que diferentes opciones pueden ser apropiadas para diferentes pacientes. En estas circunstancias, el establecimiento de las políticas en salud requieren debate e implicación de los proveedores de los servicios sanitarios, y estas pueden variar entre regiones.

Es improbable que las limitaciones existentes en la literatura se superen, ya que junto con la dificultad de llevar a cabo ensayos clínicos longitudinales, las previsibles mejoras en las pruebas comercializadas, el desarrollo de plataformas con nuevos marcadores y/o antígenos de latencia, la administración intradérmica de los antígenos específicos, probablemente reducirán los estudios con las formulaciones actuales de los IGRA. Recientemente, y finalizando la elaboración de esta guía, han sido publicados dos estudios longitudinales prospectivos con un número importante de contactos adultos y niños, los cuales reafirman la idea del bajo VPP, aunque mejor que el de la PT, y el altísimo VPN (cercano al 100%) de los IGRA (31)(62). Mientras tanto, la presente Guía basada en la evidencia, intenta dar soporte a los clínicos que usan los IGRA en la práctica clínica diaria, así como a los proveedores de los servicios de salud.

### **Actualización de la Guía**

El grupo de trabajo considera que esta guía debe ser actualizada al menos en 5 años, o antes si hay información relevante que implique cambiar alguna recomendación.

### **Declaración de conflicto de interés**

Todos los autores que participaron en la deliberación de las recomendaciones, declararon los conflictos de intereses. M.S. declaró los siguientes conflictos de intereses: recibió remuneración por dos conferencias patrocinados por Inverness Medical Iberica, S.A.U., distribuidor de QuantiFERON-TB Gold In-Tube en España, y es investigador principal de un ensayo clínico para evaluar QuantiFERON-TB Gold In-Tube en el estudio de contactos, para el cual Cellestis, Inc. (Carnegie, Australia) proporcionó los reactivos. En ningún caso los conflictos de intereses declarados se consideraron clave para no participar en las deliberaciones del grupo de trabajo.

### **Referencias**

1. Testing TT, Infection T. Targeted tuberculin testing and treatment of latent tuberculosis infection. American Thoracic Society. MMWR Recomm reports Morb Mortal Wkly Rep Recomm reports Centers Dis Control. 2000;49(RR-6):1–51.



2. Horsburgh CR. Priorities for the treatment of latent tuberculosis infection in the United States. *N Engl J Med*. 2004;350(20):2060–7.
3. Santin Cerezales M, Benitez JD. Diagnosis of tuberculosis infection using interferon-gamma-based assays. *Enferm Infecc Microbiol Clin* [Internet]. 2011;29 Suppl 1:26–33. Available from: <http://www.ncbi.nlm.nih.gov/pubmed/21420564>
4. Andersen P, Munk ME, Pollock JM, Doherty TM. Specific immune-based diagnosis of tuberculosis. *Lancet*. 2000;356:1099–104.
5. Brock I, Weldingh K, Leyten EMS, Sandra M, Ravn P, Andersen P, et al. Specific T-Cell Epitopes for Immunoassay-Based Diagnosis of Mycobacterium tuberculosis Infection Specific T-Cell Epitopes for Immunoassay-Based Diagnosis of Mycobacterium tuberculosis Infection. 2004;42(6):2379–87.
6. Rutledge TF, Boyd MF, Mazurek M, Jereb J, Vernon A, LoBue P, et al. Updated guidelines for using Interferon Gamma Release Assays to detect Mycobacterium tuberculosis infection - United States, 2010. *MMWR Recomm reports Morb Mortal Wkly Rep Recomm reports / Centers Dis Control*. 2010;59(RR-5):1–25.
7. Nice. Clinical diagnosis and management of tuberculosis, and measures for its prevention and control. Nice. 2011;(March).
8. Ruiz-Manzano J, Blanquer R, Calpe JL, Caminero JA, Caylà J, Dominguez JA et al. Diagnóstico y tratamiento de la tuberculosis. *Arch Bronconeumol*. 2008;44:551–66.
9. Moreno-Pérez D, Andrés Martín a., Altet Gómez N, Baquero-Artigao F, Escribano Montaner a., Gómez-Pastrana Durán D, et al. Diagnóstico de la tuberculosis en la edad pediátrica. *An Pediatría*. 2010;72(4):283.e1–283.e14.
10. Grupo de trabajo de la Guía de Práctica Clínica sobre el Diagnóstico, el Tratamiento y la Prevención de la Tuberculosis. Centro Cochrane Iberoamericano, coordinador. Guía de Práctica Clínica sobre el Diagnóstico, el

Tratamiento y la Prevención de la Tuberculosis. Plan de Calidad para el Sistema Nacional de Salud del Ministerio de Sanidad, Política Social e Igualdad. Agència d'Informació, Avaluació i Qualitat en Salut (AIAQS) de Catalunya; 2009. Guías de Práctica Clínica en el SNS: AATRM N° 2007/26.

11. World Health Organization. USE OF INTERFERON- $\gamma$  RELEASE ASSAYS ( IGRAs ) IN TUBERCULOSIS CONTROL IN LOW- AND MIDDLE-INCOME SETTINGS EXPERT GROUP MEETING REPORT This report contains the collective views of an international group of experts , and does not of a technology does not impl. 2010;(July).
12. Brozek JL, Aki EA, Alonso-Coello P et al. Grading quality of evidence and strength of recommendations in clinical practice. *Allergy*. 2009;64:669–77.
13. Bradshaw L, Davies E, Devine M, Flanagan P, Kelly P, O'Connor K, et al. The role of the interferon gamma release assay in assessing recent tuberculosis transmission in a hospital incident. *PLoS One*. 2011;6(6):1–5.
14. Diel R, Loddenkemper R, Niemann S, Meywald-Walter K, Nienhaus A. Negative and positive predictive value of a whole-blood interferon- $\gamma$  release assay for developing active tuberculosis: An update. *Am J Respir Crit Care Med*. 2011;183(1):88–95.
15. Bergot E, Haustraete E, Malbruny B, Magnier R, Salaün MA, Zalcman G. Observational study of quantiferon®-TB gold in-tube assay in tuberculosis contacts in a low incidence area. *PLoS One*. 2012;7(8):3–10.
16. Haldar P, Thuraisingam H, Patel H, Pereira N, Free R, Entwisle J, et al. Single-step QuantiFERON screening of adult contacts: a prospective cohort study of tuberculosis risk. 2012;(January 2007):240–6.
17. Kik S V., Franken WPJ, Mensen M, Cobelens FGJ, Kamphorst M, Arend SM, et al. Predictive value for progression to tuberculosis by IGRA and TST in immigrant contacts. *Eur Respir J*. 2010;35(6):1346–53.

18. Muñoz L, Santin M. Interferon- $\gamma$  release assays versus tuberculin skin test for targeting people for tuberculosis preventive treatment: An evidence-based review. *J Infect.* 2013;66(4):381–7.
19. Nienhaus A, Schablon A, Costa J, Diel R. Systematic review of cost and cost-effectiveness of different TB-screening strategies. *BMC Health Serv Res. BioMed Central Ltd*; 2011;11(1):247.
20. Nienhaus A, Costa JT. Screening for tuberculosis and the use of a borderline zone for the interpretation of the interferon- $\gamma$  release assay (IGRA) in Portuguese healthcare workers. *J Occup Med Toxicol.* 2013;8(1):1.
21. Dorman SE, Belknap R, Graviss E a., Reves R, Schluger N, Weinfurter P, et al. Interferon- $\gamma$  release assays and tuberculin skin testing for diagnosis of latent tuberculosis infection in healthcare workers in the united states. *Am J Respir Crit Care Med.* 2014;189(1):77–87.
22. Pollock NR, Campos-neto A, Kashino S. Healthcare Workers With Increased Risk of Latent Tuberculosis. 2013;29(9):878–86.
23. Zwerling A, Cojocariu M, McIntosh F, Pietrangelo F, Behr M a., Schwartzman K, et al. TB screening in Canadian health care workers using interferon-gamma release assays. *PLoS One.* 2012;7(8).
24. Ringshausen FC, Nienhaus A, Schablon A, Schlösser S, Schultze-Werninghaus G, Rohde G. Predictors of persistently positive *Mycobacterium-tuberculosis*-specific interferon-gamma responses in the serial testing of health care workers. *BMC Infect Dis.* 2010 Jan;10(1):220.
25. Schablon A, Diel R, Diner G, Anske U, Pankow W, Ringshausen FC, et al. Specificity of a whole blood IGRA in German nursing students. *BMC Infect Dis.* 2011 Jan;11(1):245.
26. Schablon A, Harling M, Diel R, Nienhaus A. Risk of latent TB infection in individuals employed in the healthcare sector in Germany: a multicentre

- p>prevalence study. BMC Infect Dis. 2010;10:107.
27. Fong KS, Tomford JW, Teixeira L, Fraser TG, Van Duin D, Yen-Lieberman B, et al. Challenges of interferon- $\gamma$  release assay conversions in serial testing of health-care workers in a TB control program. Chest. 2012;142(1):55–62.
  28. Gandra S, Scott WS, Somaraju V, Wang H, Wilton S, Feigenbaum M. Questionable effectiveness of the QuantiFERON-TB Gold Test (Cellestis) as a screening tool in healthcare workers. Infect Control Hosp Epidemiol. 2010;31(12):1279–85.
  29. R B. Interferon- $\gamma$  release assays in the serial testing for latent tuberculosis infection in US healthcare workers [abstract]. Am J Respir Crit Care Med. 2010;181:A2263.
  30. Casas I, Latorre I, Esteve M, Ruiz-Manzano J, Rodriguez D, Prat C, et al. Evaluation of interferon-gamma release assays in the diagnosis of recent tuberculosis infection in health care workers. PLoS One. 2009;4(8).
  31. Detjen a K, Keil T, Roll S, Hauer B, Mauch H, Wahn U, et al. Interferon-gamma release assays improve the diagnosis of tuberculosis and nontuberculous mycobacterial disease in children in a country with a low incidence of tuberculosis. Clin Infect Dis. 2007;45(3):322–8.
  32. Altet N, Dominguez J, de Souza-Galvão M-L, Jiménez-Fuentes MÁ, Milà C, Solsona J, et al. Predicting the Development of Tuberculosis with the Tuberculin Skin Test and QuantiFERON Testing. Ann Am Thorac Soc. 2015 May;12(5):680-8.
  33. Aichelburg MC, Rieger A, Breiteneker F, Pfistershammer K, Tittes J, Eltz S, et al. Detection and prediction of active tuberculosis disease by a whole-blood interferon-gamma release assay in HIV-1-infected individuals. Clin Infect Dis. 2009;48(7):954–62.
  34. Santin M, Casas S, Saumoy M, Andreu A, Moure R, Alcaide F, et al. Detection of latent tuberculosis by the tuberculin skin test and a whole-blood interferon-??

- release assay, and the development of active tuberculosis in HIV-seropositive persons. *Diagn Microbiol Infect Dis*. 2011;69(1):59–65.
35. Lange B, Vavra M, Kern W V, Wagner D. Development of tuberculosis in immunocompromised patients with a positive tuberculosis-specific IGRA. *Int J Tuberc Lung Dis*. 2012;16(4):492–5.
36. Sester M, van Leth F, Bruchfeld J, Bumbacea D, Cirillo DM, Dilektasli AG, et al. Risk Assessment of Tuberculosis in Immunocompromised Patients. A TBNET Study. *Am J Respir Crit Care Med*. 2014;190(10):1168–76.
37. Clark S a., Martin SL, Pozniak a., Steel a., Ward B, Dunning J, et al. Tuberculosis antigen-specific immune responses can be detected using enzyme-linked immunospot technology in human immunodeficiency virus (HIV)-1 patients with advanced disease. *Clin Exp Immunol*. 2007;150(2):238–44.
38. Chen J, Zhang R, Wang J, Liu L, Zheng Y, Shen Y, et al. Interferon-gamma release assays for the diagnosis of active tuberculosis in HIV-infected patients: A systematic review and meta-analysis. *PLoS One*. 2011;6(10).
39. Santin M, Muñoz L, Rigau D. Interferon- $\gamma$  release assays for the diagnosis of tuberculosis and tuberculosis infection in HIV-infected adults: A systematic review and meta-analysis. *PLoS ONE*. 2012.
40. Cattamanchi A, Smith R, Steingart KR, Metcalfe JZ, Date A, Coleman C, et al. Interferon-gamma release assays for the diagnosis of latent tuberculosis infection in HIV-infected individuals: a systematic review and meta-analysis. *J Acquir Immune Defic Syndr*. 2011;56(3):230–8.
41. Chang B, Park HY, Jeon K, Ahn JK, Cha HS, Koh EM, et al. Interferon- $\gamma$  release assay in the diagnosis of latent tuberculosis infection in arthritis patients treated with tumor necrosis factor antagonists in Korea. *Clin Rheumatol*. 2011;30(12):1535–41.
42. Garcovich S, Ruggeri a., D’Agostino M, Ardito F, De Simone C, Delogu G, et al.

- Clinical applicability of Quantiferon-TB-Gold testing in psoriasis patients during long-term anti-TNF-alpha treatment: A prospective, observational study. *J Eur Acad Dermatology Venereol*. 2012;26(12):1572–6.
43. Greveson K, Goodhand J, Capocci S, Woodward S, Murray C, Cropley I, et al. Yield and cost effectiveness of mycobacterial infection detection using a simple IGRA-based protocol in UK subjects with inflammatory bowel disease suitable for anti-TNF?? therapy. *J Crohn's Colitis*. European Crohn's and Colitis Organisation; 2013;7(5):412–8.
  44. Hsia EC, Schluger N, Cush JJ, Chaisson RE, Matteson EL, Xu S, et al. Interferon-γ release assay versus tuberculin skin test prior to treatment with golimumab, a human anti-tumor necrosis factor antibody, in patients with rheumatoid arthritis, psoriatic arthritis, or ankylosing spondylitis. *Arthritis Rheum*. 2012;64(7):2068–77.
  45. Mariette X, Baron G, Tubach F, Liote F, Combe B, Miceli-Richard C, et al. Influence of replacing tuberculin skin test with ex vivo interferon release assays on decision to administer prophylactic antituberculosis antibiotics before anti-TNF therapy. *Ann Rheum Dis*. 2012;71(11):1783–90.
  46. Laffitte E, Janssens JP, Roux-Lombard P, Thielen a M, Barde C, Marazza G, et al. Tuberculosis screening in patients with psoriasis before antitumour necrosis factor therapy: comparison of an interferon-gamma release assay vs. tuberculin skin test. *Br J Dermatol*. 2009;161(4):797–800.
  47. Jung YJ, Lyu J, Yoo B, Lee CK, Kim YG, Yang SK, et al. Combined use of a TST and the T-SPOT((R)).TB assay for latent tuberculosis infection diagnosis before anti-TNF-alpha treatment. *Int J Tuberc Lung Dis*. 2012;16(January):1300–6.
  48. Bélard E, Semb S, Ruhwald M, Werlinrud AM, Soborg B, Jensen FK, et al. Prednisolone treatment affects the performance of the QuantiFERON gold in-tube test and the tuberculin skin test in patients with autoimmune disorders screened for latent tuberculosis infection. *Inflamm Bowel Dis*.

2011;17(11):2340–9.

49. Casas S, Andreu A, Juanola X, Bordas X, Alcaide F, Moure R, et al. Diagnosis of tuberculosis infection by tuberculin skin test and a whole-blood interferon- $\gamma$  release assay in patients considered for anti-tumor necrosis factor- $\alpha$  therapy. *Diagn Microbiol Infect Dis*. Elsevier Inc.; 2011;71(1):57–65.
50. Kleinert S, Tony H-P, Krueger K, Detert J, Mielke F, Rockwitz K, et al. Screening for latent tuberculosis infection: performance of tuberculin skin test and interferon- release assays under real-life conditions. *Ann Rheum Dis*. 2012;71(11):1791–5.
51. Sauzullo I, Mengoni F, Scrivo R, Valesini G, Potenza C, et al. Evaluation of QuantiFERON-TB gold in-tube in human immunodeficiency virus infection and in patient candidates for anti-tumour necrosis factor-alpha treatment. *Int J Tuberc Lung Dis*. 2010;14:834–40.
52. Schoepfer AM, Flogerzi B, Fallegger S, Schaffer T, Mueller S, Nicod L, et al. Comparison of interferon-gamma release assay versus tuberculin skin test for tuberculosis screening in inflammatory bowel disease. *Am J Gastroenterol*. 2008;103(11):2799–806.
53. Muñoz L, Gomila A, Casas S, Castellote J, Arnan M, Rafecas A, et al. Immunodiagnostic Tests' Predictive Values for Progression to Tuberculosis in Transplant Recipients. *Transplant Direct*. 2015;1.
54. Theodoropoulos N, Lanternier F, Rassiwalla J, Mcnatt G, Preczewski L, Demayo E, et al. Use of the QuantiFERON-TB Gold interferon-gamma release assay for screening transplant candidates: A single-center retrospective study. *Transpl Infect Dis*. 2012;14(1):1–8.
55. Jeong JC, Koo TY, Jeon HJ, Park HC, Ryu HJ, Lee JP, et al. Utility of QuantiFERON-TB Assay for Prediction of Tuberculosis Development in Kidney Transplant Patients in an Intermediate-Tuberculosis-Burden Country: Lack of Evidence for Enhanced Prediction for Short-Term Tuberculosis Development. *Transplant Proc*

- [Internet]. 2014;46(2):583–7. Available from: <http://linkinghub.elsevier.com/retrieve/pii/S0041134513013225>
56. Moon SM, Lee SO, Choi SH, Kim YS, Woo JH, Yoon DH, et al. Comparison of the QuantiFERON-TB Gold In-Tube test with the tuberculin skin test for detecting latent tuberculosis infection prior to hematopoietic stem cell transplantation. *Transpl Infect Dis*. 2013;15(1):104–9.
  57. Kim S-H, Lee S-O, Park JB, Park I, Park SJ, Yun S-C, et al. A prospective longitudinal study evaluating the usefulness of a T-cell-based assay for latent tuberculosis infection in kidney transplant recipients. *Am J Transplant*. 2011;11(9):1927–35.
  58. Cámara R, Martino R. Tuberculosis after hematopoietic stem cell transplantation: incidence, clinical characteristics and outcome. ...*Transplantation*. 2000;(62):291–8.
  59. Pai M, Zwerling A, Menzies D. *Annals of Internal Medicine Review Systematic Review: T-Cell – based Assays for the Diagnosis of Latent Tuberculosis Infection: An Update*. 2008;
  60. Diel R, Loadenkemper R, Nienhaus A. Evidence-Based comparison of commercial Interferon-gamma Release assays for detecting active TB a metaanalysis. *Chest*. 2010;137(4):952–68.
  61. Zhou Q, Chen YQ, Qin SM, Tao XN, Xin JB, Shi HZ. Diagnostic accuracy of T-cell interferon- $\gamma$  release assays in tuberculous pleurisy: A meta-analysis. *Respirology*. 2011;16(3):473–80.
  62. Sester M, Sotgiu G, Lange C, Giehl C, Girardi E, Migliori GB, et al. Interferon- $\gamma$  release assays for the diagnosis of active tuberculosis: A systematic review and meta-analysis. *Eur Respir J*. 2011;37(1):100–11.
  63. Dai Y, Feng Y, Xu R, Xu W, Lu W, Wang J. Evaluation of interferon-gamma release assays for the diagnosis of tuberculosis: an updated meta-analysis. *Eur J Clin*



Microbiol Infect Dis. 2012;31(11):3127–37.

64. Dheda K, van Zyl-Smit RN, Meldau R, Meldau S, Symons G, Khalfey H, et al. Quantitative lung T cell responses aid the rapid diagnosis of pulmonary tuberculosis. *Thorax*. 2009;64(10):847–53.
65. Baba K, Sørnes S, Hoosen A a, Lekabe JM, Mpe MJ, Langeland N, et al. Evaluation of immune responses in HIV infected patients with pleural tuberculosis by the QuantiFERON TB-Gold interferon-gamma assay. *BMC Infect Dis*. 2008;8:35.
66. Dheda K, Van Zyl-Smit RN, Sechi L a., Badri M, Meldau R, Meldau S, et al. Utility of quantitative T-cell responses versus unstimulated interferon- $\gamma$  for the diagnosis of pleural tuberculosis. *Eur Respir J*. 2009;34(5):1118–26.
67. Goletti D, Stefania C, Butera O, Amicosante M, Ernst M, Sauzullo I, et al. Accuracy of immunodiagnostic tests for active tuberculosis using single and combined results: A multicenter TBNET-study. *PLoS One*. 2008;3(10).
68. Eum S, Lee YJ, Kwak HK, Min J, Via LE, Iii CEB, et al. Evaluation of the diagnostic utility of a whole-blood interferon-gamma assay for determining the risk of exposure to *Mycobacterium tuberculosis* in Bacille Calmette-Guerin (BCG)-vaccinated individuals. *Diagn Microbiol Infect Dis*. 2008;61(2):181–6.
69. Chegou NN, Walzl G, Bolliger CT, Diacon AH van den HM. Evaluation of adapted whole-blood interferon-gamma release assays for the diagnosis of pleural tuberculosis. *Respiration*. 2008;76(2):131–8.
70. Bianchi L, Galli L, Moriondo M, Veneruso G, Becciolini L, Azzari C, Chiappini E de MM. Interferon-gamma release assay improves the diagnosis of tuberculosis in children. *Pediatr Infect Dis J*. 2009;28(6):510–4.
71. Bartu V, Havelkova M KE. QuantiFERON-TB Gold in the diagnosis of active tuberculosis. *J Int Med Res*. 2008;36(3):434–7.
72. Jafari C, Ernst M, Kalsdorf B, Greinert U, Diel R, Kirsten D, et al. Rapid diagnosis of smear-negative tuberculosis by bronchoalveolar lavage enzyme-linked

- immunospot. *Am J Respir Crit Care Med*. 2006;174(9):1048–54.
73. Losi M, Bossink a., Codecasa L, Jafari C, Ernst M, Thijsen S, et al. Use of a T-cell interferon- $\gamma$  release assay for the diagnosis of tuberculous pleurisy. *Eur Respir J*. 2007;30(6):1173–9.
74. Kobashi Y, Mouri K, Yagi S, Obase Y, Miyashita N, Okimoto N, et al. Clinical evaluation for diagnosing active TB disease and transitional change of two commercial blood tests. *Scand J Infect Dis*. 2008;40(8):629–34.
75. Meier T, Eulenbruch HP, Wrighton-Smith P, Enders G, Regnath T. Sensitivity of a new commercial enzyme-linked immunospot assay (T SPOT-TB) for diagnosis of tuberculosis in clinical practice. *Eur J Clin Microbiol Infect Dis*. 2005;24(8):529–36.
76. Jafari C, Ernst M, Strassburg a., Greinert U, Kalsdorf B, Kirsten D, et al. Local immunodiagnosis of pulmonary tuberculosis by enzyme-linked immunospot. *Eur Respir J*. 2008;31(2):261–5.
77. Goletti D, Carrara S, Vincenti D, Saltini C, Busi Rizzi E, Schininà V, et al. Accuracy of an immune diagnostic assay based on RD1 selected epitopes for active tuberculosis in a clinical setting: A pilot study. *Clin Microbiol Infect*. 2006;12(6):544–50.
78. Janssens JP, Roux-Lombard P, Perneger T, Metzger M, Vivien R, Rochat T. Quantitative scoring of an interferon- $\gamma$  assay for differentiating active from latent tuberculosis. *Eur Respir J*. 2007;30(4):722–7.
79. Kim HJ, Yoon HI, Park KU, Lee CT, Lee JH. The impact of previous tuberculosis history on T-SPOT.TB?? interferon-gamma release assay results. *Int J Tuberc Lung Dis*. 2011;15(4):510–6.
80. Kim S-H, Chu K, Choi S-J, Song K-H, Kim H-B, Kim N-J, et al. Diagnosis of central nervous system tuberculosis by T-cell-based assays on peripheral blood and cerebrospinal fluid mononuclear cells. *Clin Vaccine Immunol*. 2008;15(9):1356–

- 62.
81. Kim YK, Uh Y, Lee NS, Cho MY, Eom M, Kim HY. Whole-blood interferon-gamma release assay for diagnosis of tuberculous lymphadenitis. *Tohoku J Exp Med*. 2011;224(3):189–93.
82. Nicol MP, Davies MA, Wood K, Hatherill M, Workman L, Hawkrige A, Eley B, Wilkinson KA, Wilkinson RJ, Hanekom WA, Beatty D HG. Comparison of T-SPOT.TB assay and tuberculin skin test for the evaluation of young children at high risk for tuberculosis in a community setting. *Pediatrics*. 2009;123(1):38–43.
83. Lee LN, Chou CH, Wang JY, Hsu HL, Tsai TH, Jan IS, Hsueh PR YP. Enzyme-linked immunospot assay for interferon-gamma in the diagnosis of tuberculous pleurisy. *Clin Microbiol Infec*. 2009;15(2):173–9.
84. Kim SH, Cho OH, Park SJ, Ye BD, Sung H, Kim MN, Lee SO, Choi SH, Woo JH KY. Diagnosis of abdominal tuberculosis by T-cell-based assays on peripheral blood and peritoneal fluid mononuclear cells. *J Infect*. 2009;59(6):409–15.
85. Kim SH, Choi SJ, Kim HB, Kim NJ, Oh MD CK. Diagnostic usefulness of a T-cell based assay for extrapulmonary tuberculosis. *Arch Intern Med*. 2007;167(20):2255–9.
86. Kim SH, Song KH, Choi SJ, Kim HB, Kim NJ, Oh MD CK. Diagnostic usefulness of a T-cell-based assay for extrapulmonary tuberculosis in immunocompromised patients. *Am J Med*. 2009;122(2):189–95.
87. Lenders LM, Meldau R, van Zyl-Smit RN, Woodburne V, Maredza A, Cashmore TJ, et al. Comparison of same day versus delayed enumeration of TB-specific T cell responses. *J Infect*. 2010 May;60(5):344–50.
88. Sollai S, Galli L, de Martino M, Chiappini E. Systematic review and meta-analysis on the utility of Interferon-gamma release assays for the diagnosis of *Mycobacterium tuberculosis* infection in children: a 2013 update. *BMC Infect Dis*. BioMed Central Ltd; 2014;14 Suppl 1(Suppl 1):S6.

89. Zellweger J-P, Sotgiu G, Block M, Dore S, Altet N, Blunski R, et al. Risk Assessment of Tuberculosis in Contacts by Interferon- $\gamma$  Release Assays (IGRAs). A TBNET Study. *Am J Respir Crit Care Med*. 2015 May 15;191(10):1176-84.

**Tabla 1. Recomendaciones del uso de los IGRA en los diferentes grupos de riesgo**

|                                                                     | <b>Recomendación</b>                                                                                                                                                                                                                                                                                                                      | <b>Fuerza</b> | <b>Calidad</b>                         |
|---------------------------------------------------------------------|-------------------------------------------------------------------------------------------------------------------------------------------------------------------------------------------------------------------------------------------------------------------------------------------------------------------------------------------|---------------|----------------------------------------|
| <b>Los IGRA en el estudio de contactos</b>                          | El grupo de trabajo sugiere iniciar el estudio de contactos en adultos con la PT, y en los vacunados con BCG confirmar los resultados positivos con un IGRA en el momento de la lectura de la PT.                                                                                                                                         | Débil         | Baja/Muy baja                          |
| <b>Los IGRA en trabajadores sanitarios</b>                          | El grupo de trabajo sugiere realizar el cribado inicial y periódico con la PT, y confirmar los casos positivos mediante un IGRA en el momento de la lectura.<br>Una vez la PT resulta positiva (con IGRA negativo), si no hay indicios de enfermedad activa ni evidencia de inmunosupresión, se seguirá el cribado periódico con el IGRA. | Débil         | Moderada<br>(IGRA)<br>Muy baja<br>(PT) |
| <b>Los IGRA para el diagnóstico de TB en niños &lt; 5 años</b>      | En niños menores de 5 años con sospecha fundada de TB, el grupo de trabajo sugiere realizar la PT e IGRA como pruebas complementarias al estudio microbiológico y radiológico para el diagnóstico.                                                                                                                                        | Débil         | Muy baja                               |
| <b>Los IGRA en el estudio de contactos en niños</b>                 | En niños mayores de 5 años, el grupo de trabajo sugiere iniciar el estudio de contactos con PT, y en los vacunados con BCG, confirmar los casos positivos mediante un IGRA en el momento de la lectura de la PT.                                                                                                                          | Débil         | Muy Baja                               |
|                                                                     | En niños menores de 5 años, el grupo de trabajo sugiere realizar el estudio de contactos con la PT e IGRA independientemente de si estuviesen vacunados previamente con BCG.                                                                                                                                                              |               |                                        |
| <b>Los IGRA en personas infectadas por el VIH</b>                   | Para el cribado de infección tuberculosa en las personas infectadas por el VIH, el grupo de trabajo sugiere realizar la PT y un IGRA.<br>En personas con un nivel de CD4 <200/mL, el grupo de trabajo sugiere realizar solo un IGRA.                                                                                                      | Débil         | Baja/Muy baja                          |
| <b>Los IGRA en pacientes con EIC (previo a terapias biológicas)</b> | Para el cribado de infección TB en los pacientes con EIC que vayan a recibir terapias biológicas, el grupo de trabajo sugiere realizar la PT y un IGRA.                                                                                                                                                                                   | Débil         | Baja/Muy baja                          |
| <b>Los IGRA en pacientes que</b>                                    | Para el cribado de infección TB en los pacientes que van a ser                                                                                                                                                                                                                                                                            | Débil         | Muy baja                               |

|                                                |                                                                                                                                                                                                              |        |          |
|------------------------------------------------|--------------------------------------------------------------------------------------------------------------------------------------------------------------------------------------------------------------|--------|----------|
| <b>van a someterse a trasplante</b>            | sometidos a trasplante de órgano sólido o de precursores hematopoyéticos alogénicos, se sugiere realizar la PT y un IGRA.                                                                                    |        |          |
| <b>Los IGRA en el diagnóstico de TB activa</b> | Para el diagnóstico de TB activo, el grupo de trabajo recomienda no utilizar los IGRA ni la PT como prueba única.                                                                                            | Fuerte | Baja     |
|                                                | En pacientes con sospecha fundada de enfermedad TB, con el objetivo de confirmar la existencia de infección TB, el grupo de trabajo sugiere realizar un IGRA como dato de apoyo al diagnóstico de TB activa. | Débil  | Muy baja |

TB, tuberculosis; BCG, Bacille Calmette-Guerin; IGRA, Interferon-gamma release assay; QTF-GIT, QuantiFERON®-TB Gold In-tube; PT, prueba de la tuberculina; VIH, virus de la inmunodeficiencia humana

**Tabla 2. Síntesis y calidad de la evidencia usada para la recomendación sobre el uso de los IGRA en el estudio de contactos.**

|                    | Estudios <sup>(Refs.)</sup> | Diseño                                               | Países                                             | Seguimiento                                                        | Resultados |           | Calidad         |
|--------------------|-----------------------------|------------------------------------------------------|----------------------------------------------------|--------------------------------------------------------------------|------------|-----------|-----------------|
|                    |                             |                                                      |                                                    |                                                                    | VPP        | VPN       |                 |
| QTF-GIT            | 5 <sup>(12-16)</sup>        | Observacionales<br>4 prospectivos<br>1 Retrospectivo | 2 R. Unido<br>1 Francia<br>1 Alemania<br>1 Holanda | 2 y 3 años<br>2,9 a. (media)<br>3,8 a. (media)<br>1,8 a. (mediana) | 0,4-17,3%  | 98-100%   | Baja a muy baja |
| T-SPOT.TB          | 1 <sup>(16)</sup>           | Observacional<br>Prospectivo                         | Holanda                                            | 1,8 a. (mediana)                                                   | 3,3%       | 98,3%     | Muy baja        |
| PT ( $\geq 10$ mm) | 3 <sup>(13,14,16)</sup>     | Observacionales<br>2 Prospectivos<br>1 Retrospectivo | 1 Francia<br>1 Alemania<br>1 Holanda               | 2,9 a. (media)<br>3,8 a. (media)<br>1,8 a. (mediana)               | 2,8-3,1%   | 99,4-100% | Muy baja        |

IGRA, Interferon-gamma release assay; QTF-GIT, QuantiFERON®-TB Gold In-tube; PT, prueba de la tuberculina

**Tabla 3a. Síntesis y calidad de la evidencia usada para la recomendación sobre el uso de los IGRA en personal sanitario (Desarrollo de TB).**

|                    | Estudios <sup>(Refs.)</sup> | Diseño                          | Países                             | Seguimiento                          | Resultados |      | Calidad            |
|--------------------|-----------------------------|---------------------------------|------------------------------------|--------------------------------------|------------|------|--------------------|
|                    |                             |                                 |                                    |                                      | VPP        | VPN  |                    |
| QTF-GIT            | 3 <sup>(12, 19, 20)</sup>   | Observacionales<br>Prospectivos | 1 R. Unido<br>1 Portugal<br>1 EEUU | 2 años<br>1,1 a. (media)<br>1,5 años | 0-0,4%     | 100% | Moderada           |
| T-SPOT.TB          | 1 <sup>(20)</sup>           | Observacional<br>Prospectivo    | 1 EEUU                             | 1,5 años                             | 0          | 100% | Moderada a<br>baja |
| PT ( $\geq 10$ mm) | 1 <sup>(20)</sup>           | Observacional<br>Prospectivo    | 1 EEUU                             | 1,5 años                             | 0          | 100% | Muy baja           |

IGRA, Interferon-gamma release assay; QTF-GIT, QuantiFERON®-TB Gold In-tube; PT, prueba de la tuberculina



**Tabla 3b. Síntesis y calidad de la evidencia usada para la recomendación sobre el uso de los IGRA en personal sanitario (conversiones y reversiones).**

|                    | Estudios <sup>(Refs.)</sup> | Diseño                                               | Países                                         | Resultados   |             | Calidad         |
|--------------------|-----------------------------|------------------------------------------------------|------------------------------------------------|--------------|-------------|-----------------|
|                    |                             |                                                      |                                                | Conversiones | Reversiones |                 |
| QTF-GIT            | 10 <sup>(20-29)</sup>       | Observacionales<br>8 Prospectivos<br>2 Retrospectivo | 5 EEUU<br>3 Alemania<br>1 Portugal<br>1 Canadá | 0,7-8,3%     | 31,0-71,4%  | Baja a muy baja |
| T-SPOT.TB          | 2 <sup>(20, 29)</sup>       | Observacionales<br>1 Prospectivo<br>1 Retrospectivo  | 1 Portugal<br>1 EEUU                           | 3,9-6,1%     | 52,9%       | Baja a muy baja |
| PT ( $\geq 10$ mm) | 1 <sup>(21)</sup>           | Observacional<br>Prospectivo                         | EEUU                                           | 0,9%         | --          | Muy baja        |

IGRA, Interferon-gamma release assay; QTF-GIT, QuantiFERON<sup>®</sup>-TB Gold In-tube; PT, prueba de la tuberculina

**Tabla 4. Síntesis y calidad de la evidencia para la recomendación sobre el uso de los IGRA en el estudio de contactos en niños.**

|         | Estudios <sup>(Refs.)</sup> | Diseño                          | Países                 | Seguimiento    | Resultados |      | Calidad  |
|---------|-----------------------------|---------------------------------|------------------------|----------------|------------|------|----------|
|         |                             |                                 |                        |                | VPP        | VPN  |          |
| QTF-GIT | 2 <sup>(14, 32)</sup>       | Observacionales<br>Prospectivos | 1 Alemania<br>1 España | 3,8 a. (media) | 5.3%-75%%  | 100% | Muy baja |
| PT      |                             |                                 |                        |                | 4%-14%     | 100% |          |

IGRA, Interferon-gamma release assay; QTF-GIT, QuantiFERON<sup>®</sup>-TB Gold In-tube; PT, prueba de la tuberculina

**Tabla 5. Síntesis y calidad de la evidencia usada para la recomendación sobre el uso de los IGRA en las personas infectadas por el VIH**

|                | Estudios <sup>(Refs.)</sup> | Diseño                                               | Países                                                         | Seguimiento                                                            | Resultados |           | Calidad         |
|----------------|-----------------------------|------------------------------------------------------|----------------------------------------------------------------|------------------------------------------------------------------------|------------|-----------|-----------------|
|                |                             |                                                      |                                                                |                                                                        | VPP        | VPN       |                 |
| QTF-GIT        | 4 <sup>(33-36)</sup>        | Observacionales<br>3 Prospectivos<br>1 Retrospectivo | Austria 1<br>Alemania 1<br>España 1<br>Europa (11 países)<br>1 | 1,6 a. (media)<br>2,9 a. (media)<br>1,9 a. (media)<br>1,8 a. (mediana) | 5,9-25%    | 98,8-100% | Baja a muy baja |
| T-SPOT.TB      | 3 <sup>(35-37)</sup>        | Observacionales<br>2 Prospectivos<br>1 Retrospectivo | Alemania 1<br>Reino Unido 1<br>Europa (11 países)<br>1         | 2,9 a. (media)<br>1 a. (los +)/3 m. (los -)<br>1,8 a. (mediana)        | 6,3-9,1%   | 98,8-100% | Baja a muy baja |
| PT<br>(≥10 mm) | 1 <sup>(36)</sup>           | Observacional<br>1 Prospectivo<br>1 Retrospectivo    | Europa (11 países)<br>1                                        | 1,8 a. (mediana)                                                       | 7,1%       | 98,9%     | Muy baja        |

IGRA, Interferon-gamma release assay; QTF-GIT, QuantiFERON®-TB Gold In-tube; PT, prueba de la tuberculina

**Tabla 6. Síntesis y calidad de la evidencia usada para la recomendación sobre el uso de los IGRA en los pacientes con EIC**

|           | Estudios <sup>(Refs.)</sup>      | Diseño                                              | Países                                                                                                               | Seguimiento                                                                                                               | Resultados       |           | Calidad         |
|-----------|----------------------------------|-----------------------------------------------------|----------------------------------------------------------------------------------------------------------------------|---------------------------------------------------------------------------------------------------------------------------|------------------|-----------|-----------------|
|           |                                  |                                                     |                                                                                                                      |                                                                                                                           | VPP              | VPN       |                 |
| QTF-GIT   | 6 <sup>(36, 41-47)</sup>         | Observacionales<br>Prospectivos                     | R. Corea 1<br>Italia 1<br>Reino Unido 1<br>Francia 1<br>Europa (11 países) 1<br>Multinacional 1                      | 1,5 a. (mediana)<br>1 año<br>2 a. (mediana)<br>1 año<br>1,8 a. (mediana)<br>1 año                                         | 0<br>(1 estudio) | 97-100%   | Baja a muy baja |
| T-SPOT.TB | 4 <sup>(36, 45-47)</sup>         | Observacionales<br>3 Prospectivo<br>1 Retrospectivo | Francia 1<br>Suiza 1<br>EEUU 1<br>Europa (11 países) 1                                                               | 1 año<br>1,4 a. (mediana)<br>3,1 a. (mediana)<br>1,8 a. (mediana)                                                         | 0-1,9%           | 100%      | Baja a muy baja |
| PT        | 7 <sup>(36, 41, 42, 44-47)</sup> | Observacional<br>6 Prospectivos<br>1 Retrospectivo  | R. Corea 1<br>Italia 1<br>Reino Unido 1<br>Francia 1<br>Suiza 1<br>EEUU 1<br>Europa (11 países) 1<br>Multinacional 1 | 1,5 a. (mediana)<br>1 año<br>2 a. (mediana)<br>1 año<br>1,4 a. (mediana)<br>3,1 a. (mediana)<br>1,8 a. (mediana)<br>1 año | 0-5,4%           | 98,3-100% | Baja a muy baja |

IGRA, Interferon-gamma release assay; QTF-GIT, QuantiFERON®-TB Gold In-tube; PT, prueba de la tuberculina

**Tabla 7. Síntesis y calidad de la evidencia usada para la recomendación sobre el uso de los IGRA en los pacientes tributarios de trasplante**

|                                                      | Estudios <sup>(Refs.)</sup> | Diseño                                                | Países                                         | Seguimiento                                                                   | Resultados |         | Calidad  |
|------------------------------------------------------|-----------------------------|-------------------------------------------------------|------------------------------------------------|-------------------------------------------------------------------------------|------------|---------|----------|
|                                                      |                             |                                                       |                                                |                                                                               | VPP        | VPN     |          |
| Trasplante de órgano sólido                          |                             |                                                       |                                                |                                                                               |            |         |          |
| QTF-GIT                                              | 4 <sup>(35, 53-56)</sup>    | Observacionales<br>2 Prospectivos<br>2 Retrospectivos | España 1<br>Alemania 1<br>EEUU 1<br>R. Corea 1 | 4 a. (mediana)<br>2,9 a. (media)<br>10,8 meses (media)<br>8,4 meses (mediana) | 0-4%       | 99-100% | Muy baja |
| T-SPOT.TB                                            | 1 <sup>(57)</sup>           | Observacional<br>Prospectivo                          | R. Corea 1                                     | 1,9 a. (mediana)                                                              | 6%         | 100%    | Muy baja |
| Trasplante de progenitores hematopoyéticos alogénico |                             |                                                       |                                                |                                                                               |            |         |          |
| QTF-GIT                                              | 3 <sup>(35, 53, 56)</sup>   | Observacionales<br>2 Prospectivos<br>1 Retrospectivo  | España 1<br>Alemania 1<br>R. Corea 1           | 4 a. (mediana)<br>2,9 a. (media)                                              | 0-3%       | 95-100% | Muy baja |
| PT                                                   | 1 <sup>(56)</sup>           | Observacional<br>Prospectivo                          | R. Corea 1                                     | 9,6 meses (mediana)                                                           | 0          | 97,5%   | Muy baja |

IGRA, Interferon-gamma release assay; QTF-GIT, QuantiFERON®-TB Gold In-tube; PT, prueba de la tuberculina

**Tabla 8a. Síntesis y calidad de la evidencia usada para la recomendación sobre el uso de los IGRA en sangre en el diagnóstico de TB activa en adultos y niños**

|                | Estudios <sup>(Refs.)</sup>           | Diseño                        | Países                                                                                                               | Resultados              |                          | Calidad  |
|----------------|---------------------------------------|-------------------------------|----------------------------------------------------------------------------------------------------------------------|-------------------------|--------------------------|----------|
|                |                                       |                               |                                                                                                                      | Sensibilidad<br>(IC95%) | Especificidad<br>(IC95%) |          |
| Adultos        |                                       |                               |                                                                                                                      |                         |                          |          |
| QTF-GIT        | 8 <sup>(64-71)</sup>                  | Transversales<br>Prospectivos | S. África 4<br>Italia 2<br>R. Corea 1<br>R. Checa 1                                                                  | 80%<br>(75-84)          | 79%<br>(75-82)           | Baja     |
| T-SPOT.TB      | 12 <sup>(72-83)</sup>                 | Transversales<br>Prospectivos | R. Corea 4<br>Italia 3<br>Alemania 3<br>S. África 3<br>Japón 1<br>R. Checa 1                                         | 81%<br>(78-84)          | 59%<br>(56-62)           |          |
| PT             | 12 <sup>(67, 70, 76, 82, 84-86)</sup> | Transversales<br>Prospectivos | Alemania 3<br>R. Corea 3<br>Italia 2<br>Japón 1<br>S. África 1<br>R. Checa 1<br>Europa (Italia, Alemania, Holanda) 1 | 65%<br>(61-68)          | 75%<br>(72-78)           |          |
| Niños < 5 años |                                       |                               |                                                                                                                      |                         |                          |          |
| QTF-GIT        | 1 <sup>(31)</sup>                     | Observacional                 | Alemania                                                                                                             | 93%<br>(77-99)          | 100%<br>(91-100)         | Muy baja |

|           |  |             |  |                  |                 |  |
|-----------|--|-------------|--|------------------|-----------------|--|
| T-SPOT.TB |  | Prospectivo |  | 93%<br>(77-99)   | 98%<br>(87-100) |  |
| PT        |  |             |  | 100%<br>(88-100) | 58%<br>(42-73)  |  |

IGRA, Interferon-gamma release assay; QTF-GIT, QuantiFERON®-TB Gold In-tube

**Tabla 8b. Síntesis y calidad de la evidencia usada para la recomendación sobre el uso de los IGRA en fluidos extra-sanguíneos en adultos**

|           | Estudios (Refs.)               | Diseño                        | Países                                  | Resultados              |                          | Calidad |
|-----------|--------------------------------|-------------------------------|-----------------------------------------|-------------------------|--------------------------|---------|
|           |                                |                               |                                         | Sensibilidad<br>(IC95%) | Especificidad<br>(IC95%) |         |
| QTF-GIT   | 4 (66-68, 71)                  | Transversales<br>Prospectivos | S. África 4                             | 48%<br>(35-58)          | 82%<br>(70-91)           | Baja    |
| T-SPOT.TB | 7 (66, 68, 74, 75, 78, 83, 86) | Transversales<br>Prospectivos | S. África 2<br>Alemania 2<br>R. Corea 1 | 88%<br>(82-92)          | 82%<br>(78-86)           |         |

IGRA, Interferon-gamma release assay; QTF-GIT, QuantiFERON®-TB Gold In-tube

## Anexo: Estrategia de búsqueda bibliográfica

### MEDLINE (PubMed; 13.03.2013)

|     |                                                                                                                                                        |        |
|-----|--------------------------------------------------------------------------------------------------------------------------------------------------------|--------|
| #2  | "Interferon-gamma Release Tests"[Mesh]                                                                                                                 | 199    |
| #3  | Interferon-Gamma Release Assay*[tiab]                                                                                                                  | 629    |
| #4  | Interferon-Gamma Assay*[tiab]                                                                                                                          | 159    |
| #5  | Interferon-Gamma test*[tiab]                                                                                                                           | 23     |
| #6  | IGRA[tiab]                                                                                                                                             | 319    |
| #7  | IGRAS[tiab]                                                                                                                                            | 242    |
| #8  | QuantiFERON[tiab]                                                                                                                                      | 802    |
| #9  | QFT[ti]                                                                                                                                                | 16     |
| #10 | T-SPOT.TB[tiab]                                                                                                                                        | 239    |
| #11 | #2 OR #3 OR #4 OR #5 OR #6 OR #7 OR #8 OR #9 OR #10                                                                                                    | 1438   |
| #12 | systematic[sb]                                                                                                                                         | 197472 |
| #13 | systematic review[tiab] OR Meta-Analysis[pt] OR Meta-Analysis as Topic[mh] OR Meta-Analys*[tiab] OR "Cochrane Database Syst Rev"[Journal: __jrid21711] | 95337  |
| #15 | #11 AND #13                                                                                                                                            | 38     |
| #16 | #11 AND #12                                                                                                                                            | 60     |
| #17 | #15 OR #16                                                                                                                                             | 63     |
| #18 | #11 NOT #17                                                                                                                                            | 1375   |

### EMBASE (Embase Classic+Embase <1947 to 2013 Week 10>; 13.03.2013)

- 1 exp interferon gamma release assay/ (657)
- 2 Interferon-Gamma Release Assay\*.ti,ab. (592)
- 3 Interferon-Gamma Assay\*.ti,ab. (107)
- 4 Interferon-Gamma test\*.ti,ab. (15)
- 5 IGRA.ti,ab. (528)
- 6 IGRAS.ti,ab. (366)
- 7 QuantiFERON.ti,ab. (1234)
- 8 QFT.ti. (25)

- 9 T-SPOT?TB.ti,ab. (295)
- 10 1 or 2 or 3 or 4 or 5 or 6 or 7 or 8 or 9 (2100)
- 11 exp "systematic review"/ (58051)
- 12 meta analysis/ (69369)
- 13 systematic review.ti. (29199)
- 14 meta?nalysis.ti. (807)
- 15 meta analys\*.ti. (31304)
- 16 11 or 12 or 13 or 14 or 15 (117109)
- 17 10 and 16 (49)
- 18 10 not 17 (2051)
